# Supplementary material for: Clinical characteristics and outcomes of primary versus secondary gastrointestinal mantle cell lymphoma
Source: PubMed Central journal article supplement (PMC7791108; doi:10.1038/s41408-020-00394-z), 2021-01-07
Supplement: 41408_2020_394_MOESM1_ESM.pdf [file 41408_2020_394_MOESM1_ESM.pdf]

## Supplemental Figure 1. Description of study patient selection

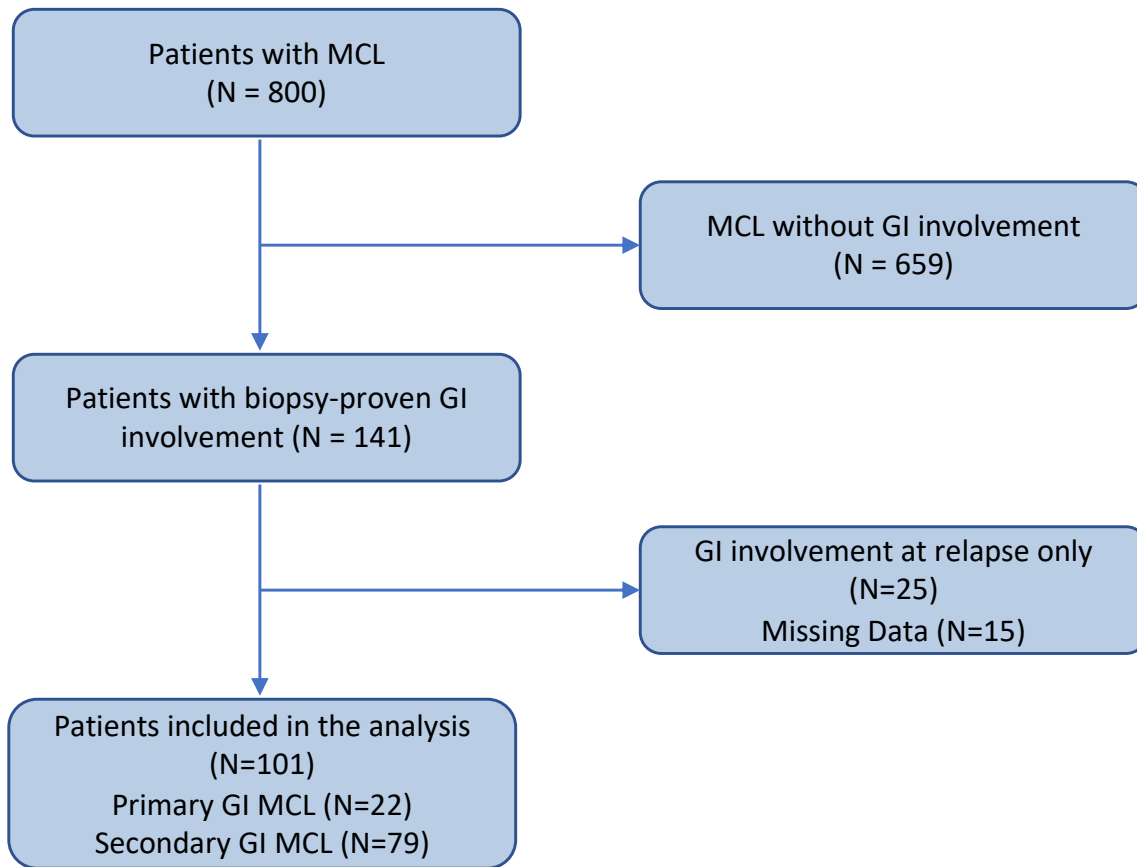

Abbreviations used: MCL, mantle cell lymphoma; GI, gastrointestinal.
